# Supplementary material
Source: Springer Nature journal article supplement (https://www.springermedizin.de/resource/supplementary/12874_2014_1107_MOESM1_ESM.pdf/9433556)
Supplement: MOESM1 [file 9433556]

Male Gulf War Era Veterans who applied for disability benefits based on PTSD  
N=324

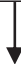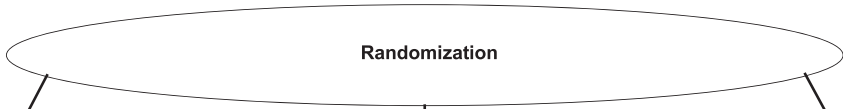

Confidential Survey  
N=109

Anonymized-Envelope Survey  
N=109

Anonymous-Postcard Survey  
N=106

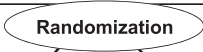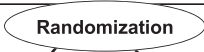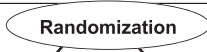

**\$10 Incentive N=55**  
  
Returned N=24  
Non-Responder N=31  
Response Rate: 43.6%

**\$20 Incentive N=54**  
  
Returned N=37  
Non-Responder N=17  
Response Rate: 68.5%

**\$10 Incentive N=54**  
  
Returned N=32  
Non-Responder N=22  
Response Rate: 59.3%

**\$20 Incentive N=55**  
  
Returned N=37  
Non-Responder N=18  
Response Rate: 67.3%

**\$10 Incentive N=52**  
  
Returned N=29  
Non-Responder N=23  
Response Rate: 55.8%

**\$20 Incentive N=54**  
  
Returned N=37  
Non-Responder N=17  
Response Rate: 68.5%
